# Supplementary material for: The potential impact of COVID-19-related disruption on tuberculosis burden
Source: PubMed Central journal article supplement — Eur Respir J. 2020 Aug 13;56(2):2001718. doi: 10.1183/13993003.01718-2020 (PMC7278504; doi:10.1183/13993003.01718-2020), 2020-08-13
Supplement: ERJ-01718-2020.Shareable.pdf [file ERJ-01718-2020.Shareable.pdf]

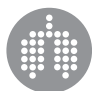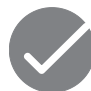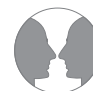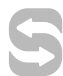

SHAREABLE PDF

# The potential impact of COVID-19-related disruption on tuberculosis burden

C. Finn McQuaid<sup>1</sup>, Nicky McCreesh<sup>1</sup>, Jonathan M. Read<sup>2</sup>, Tom Sumner<sup>1</sup>, CMMID COVID-19 Working Group<sup>4</sup>, Rein M.G.J. Houben<sup>1</sup>, Richard G. White<sup>1</sup> and Rebecca C. Harris<sup>1,3</sup>

**Affiliations:** <sup>1</sup>TB Modelling Group, TB Centre, and Centre for Mathematical Modelling of Infectious Diseases, Dept of Infectious Disease Epidemiology, London School of Hygiene and Tropical Medicine, London, UK. <sup>2</sup>Center for Health Informatics Computing and Statistics, Lancaster Medical School, Lancaster University, Lancaster, UK. <sup>3</sup>Sanofi Pasteur, Singapore. <sup>4</sup>A list of members of the CMMID COVID-19 Working Group can be found in the acknowledgements section.

**Correspondence:** Dept of Infectious Disease Epidemiology, London School of Hygiene and Tropical Medicine, Keppel Street, London, WC1E 7HT, UK. E-mail: finn.mcquaid@lshtm.ac.uk

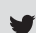

@ERSpublications

**Any benefit of social distancing on TB deaths is likely to be outweighed by health service disruption. As such, it is crucially important to maintain and strengthen TB-related health services during, and after, the COVID-19 pandemic.** <https://bit.ly/30aWZnp>

**Cite this article as:** McQuaid CF, McCreesh N, Read JM, *et al.* The potential impact of COVID-19-related disruption on tuberculosis burden. *Eur Respir J* 2020; 56: 2001718 [<https://doi.org/10.1183/13993003.01718-2020>].

This single-page version can be shared freely online.

## To the Editor:

Before the coronavirus disease 2019 (COVID-19) pandemic, over 4000 people were dying from tuberculosis (TB) every day [1]. As with past emergencies [2], the impact of COVID-19 on TB outcomes is a serious cause for concern [3] but is currently unknown. Health system overload, due to high numbers of COVID-19 cases, as well as interventions necessary to limit the transmission of severe acute respiratory syndrome coronavirus 2 (SARS-CoV-2), could result in severe reductions in health service availability and access for the detection and treatment of TB cases [4]. However, physical distancing interventions could also limit *Mycobacterium tuberculosis* transmission outside of households, where most transmission occurs [5]. This has not been adequately explored in concurrent work [6–8], and it is currently unclear whether social distancing could compensate for disruptions in TB services, and what the impact of these combined COVID-19 disruption effects on TB burden is likely to be.
